# Supplementary material
Source: publisher figshare collection journal article supplement (https://acs.figshare.com/ndownloader/files/4716277)
Supplement: Supplementary file 1 [file 4716277]

## Supplementary Materials

### **Mechanistic Diversity in the RuBisCO Superfamily: The “Enolase” in the Methionine Salvage Pathway in *Geobacillus kaustophilus***

Heidi J. Imker, A. A. Fedorov, E. V. Fedorov, S. C. Almo, and J. A. Gerlt

*Secondary structural elements of the polypeptide.* The monomer of the “enolase,” like the monomer of RuBisCO, is composed of two domains, an N-terminal  $\alpha+\beta$  domain (residues 1-120) and a C-terminal  $(\beta/\alpha)_8$ -barrel domain (residues 121-413). Using the secondary structure labeling suggested for Rubisco (*I*), the N-terminal domain contains four antiparallel  $\beta$ -strands,  $\beta$ B (1-11),  $\beta$ C (47-58),  $\beta$ D (70-81), and  $\beta$ E (104-111), and three  $\alpha$ -helices:  $\alpha$ B (16-28),  $\alpha$ C (88-101), and  $\alpha$ D (113-119); this domain also contains two additional short  $\alpha$ -helical segments, 39-43 and 61-66. The C-terminal domain contains eight  $\beta$ -strands,  $\beta$ 1 (140-147),  $\beta$ 2 (170-175),  $\beta$ 3 (205-214),  $\beta$ 4 (234-239),  $\beta$ 5 (260-265),  $\beta$ 6 (295-300),  $\beta$ 7 (329-336),  $\beta$ 8 (353-359), and eight  $\alpha$ -helices,  $\alpha$ 1 (154-169),  $\alpha$ 2 (186-203),  $\alpha$ 3 (220-231),  $\alpha$ 4 (245-253),  $\alpha$ 5 (281-291),  $\alpha$ 6 (310-321),  $\alpha$ 7 (340-350) and  $\alpha$ 8 (369-384). An additional  $\alpha$ -helix  $\alpha$ E (127-135) is located at the N-terminal end of the barrel domain, and a C-terminal extension contains two additional  $\alpha$ -helices,  $\alpha$ G (388-395) and  $\alpha$ H (397-406).

The monomer of the “enolase” activated with bicarbonate and  $\text{Mg}^{2+}$  and complexed with the alternate substrate DK-H 1-P (structure 4) can be superimposed on the monomer of subunit L of spinach RuBisCO activated with bicarbonate and  $\text{Mg}^{2+}$  and complexed with 2CABP (8RUC)

(2) with an rmsd of 1.72 Å for 369 C $\alpha$ -pairs. However, the details of the structures of the monomers differ. The N-terminal segment 1-33 is missing in the “enolase.” The BC loop, between  $\alpha$ B and  $\beta$ C in the N-terminal domain, has different conformations and orientations in the two structures. The CD loop, between  $\beta$ C4 and  $\beta$ D in the N-terminal domain, is shorter in RuBisCO (90-96) than in the “enolase” (56-72); in the “enolase” this loop includes a short helix (60-66) which is missing in RuBisCO. The loop between  $\alpha$ C and  $\beta$ E is longer in RuBisCO. In RuBisCO the loop between  $\alpha$ 6 and  $\beta$ 7 in the ( $\beta/\alpha$ )<sub>8</sub>-barrel is a long  $\beta$ -hairpin and includes residues 352-370; in the “enolase” this loop includes only residues 323-326. The loop between  $\alpha$ 8 and  $\alpha$ G, located at N-terminal end of the ( $\beta/\alpha$ )<sub>8</sub>-barrel domain, is longer in RuBisCO (430-443) than in the “enolase” (residues 386-387). The C-terminal segments (463-475 in RuBisCO) and (407-413 in the “enolase”) have different orientations.

The monomers are packed as tight dimers, as found in the structure of RuBisCO; the structures of the dimers of the “enolase” and RuBisCO are compared in Figure 10 (panel A, “enolase”; panel B, spinach RuBisCO). The dimer interface is formed by three regions of interpolypeptide contacts: between the N-terminal domains of both monomers, between the N-terminal domain of one monomer and the C-terminal domain of the second monomer, and between the C-terminal domains of both monomers. The first region involves interactions of the CD loops from the N-terminal domains of both monomers across the local two-fold axis. The second region involves interactions between the L1, L2 and L3 loops at the ends of the first, second, and third  $\beta$ -strands of the ( $\beta/\alpha$ )<sub>8</sub>-barrel domain of one monomer and helices  $\alpha$ B,  $\alpha$ C and the BC loop of the N-terminal domain of the second monomer; this interface forms the active site. The third region involves interactions between the L5 loops at the ends of the fifth  $\beta$ -strands of the ( $\beta/\alpha$ )<sub>8</sub>-barrel domains in both monomers.

*Dimer interface.* The dimer of the “enolase” activated with bicarbonate and  $\text{Mg}^{2+}$  and complexed with DK-H 1-P (structure 4) can be superimposed on the dimer of spinach RuBisCO activated with bicarbonate and  $\text{Mg}^{2+}$  and complexed with 2CABP (8RUC) with an rmsd of 2.18 Å for 720 C $\alpha$ -pairs. The interface between the N-terminal domains of both subunits is absent in RuBisCO because the CD loops differ in conformation. The interfaces between the N-terminal domain of one monomer and C-terminal domain of adjacent monomer differ in the two structures. The BC loop from N-terminal domain in one subunit is much closer to the active site in C-terminal domain of adjacent subunit in RuBisCO; also, these loops have different conformations. In RuBisCO the “extra” N-terminal extension (1-33) additionally closes the active site and is positioned behind the BC loop. As a result of these differences, the interface between the N-terminal domain of one subunit and C-terminal domain of the second subunit is tighter in RuBisCO than in the “enolase.”

- (1) Knight, S., Andersson, I., and Branden, C. I. (1990) Crystallographic analysis of ribulose 1,5-bisphosphate carboxylase from spinach at 2.4 Å resolution. Subunit interactions and active site. *J Mol Biol* 215, 113-60.
- (2) Andersson, I. (1996) Large structures at high resolution: the 1.6 Å crystal structure of spinach ribulose-1,5-bisphosphate carboxylase/oxygenase complexed with 2-carboxyarabinitol bisphosphate. *J Mol Biol* 259, 160-74.
